# Supplementary material for: Phenothiazine-functionalized push–pull Zn porphyrin photosensitizers for efficient dye-sensitized solar cells
Source: Royal Society of Chemistry journal article supplement (doi:10.1039/c5ra26754d), 2016-01-01
Supplement: c5ra26754d1.pdf [file c5ra26754d1.pdf]

## Electronic Supplementary Information (ESI)

### **Phenothiazine-functionalized push-pull Zn porphyrin photosensitizers for efficient dye-sensitized solar cells**

Xing Qian,<sup>ab</sup> Lin Lu,<sup>a</sup> Yi-Zhou Zhu,<sup>\*a</sup> Huan-Huan Gao<sup>a</sup> and Jian-Yu Zheng<sup>\*ac</sup>

*<sup>a</sup>State Key Laboratory and Institute of Elemento-Organic Chemistry, Nankai University, Tianjin 300071, China*

*<sup>b</sup>School of Chemical Engineering, Fuzhou University, Fuzhou 350116, China*

*<sup>c</sup>Collaborative Innovation Center of Chemical Science and Engineering (Tianjin), Nankai University, Tianjin 300071, China*

\* E-mail: zhuyizhou@nankai.edu.cn; jyzheng@nankai.edu.cn.

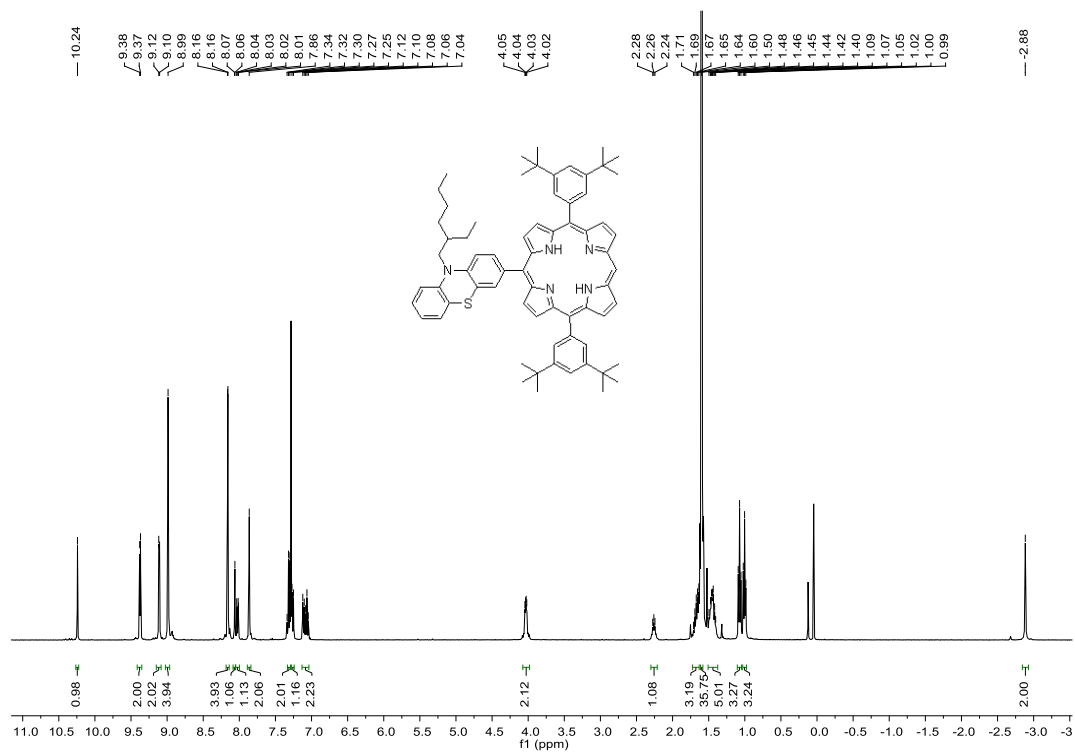

**Fig. S1**  $^1\text{H NMR}$  of compound 3a in  $\text{CDCl}_3$ .

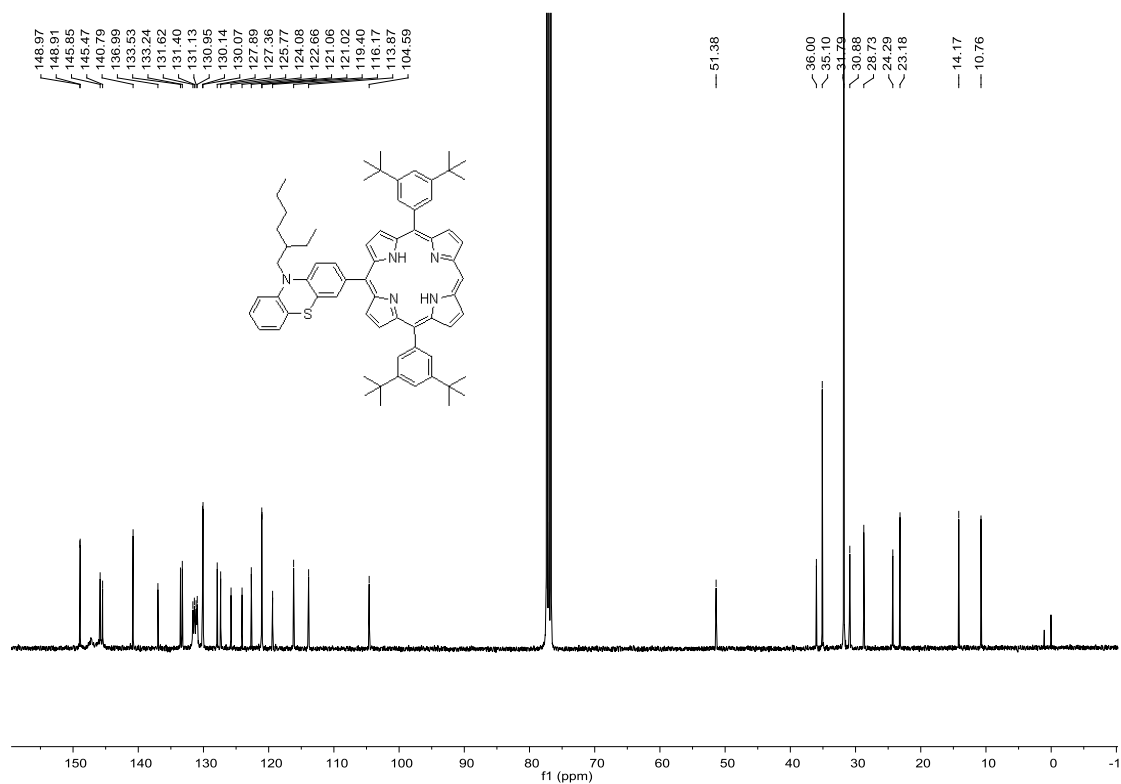

**Fig. S2**  $^{13}\text{C NMR}$  of compound 3a in  $\text{CDCl}_3$ .

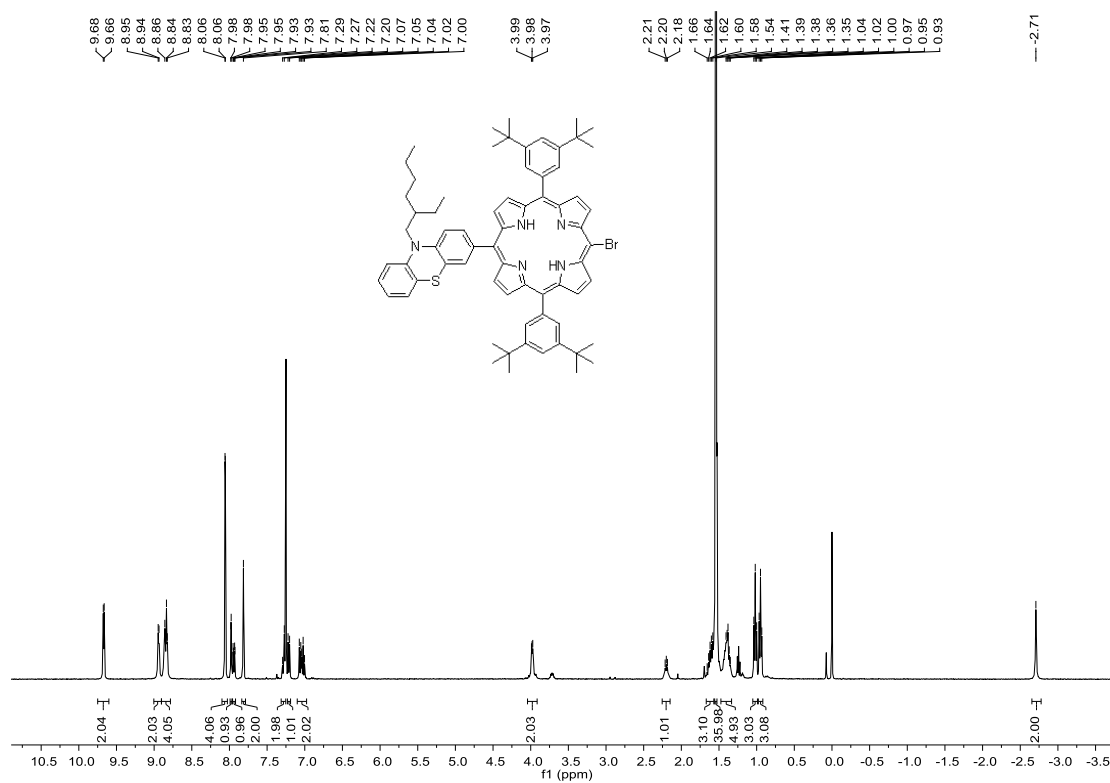

Fig. S3 <sup>1</sup>H NMR of compound **3b** in CDCl<sub>3</sub>.

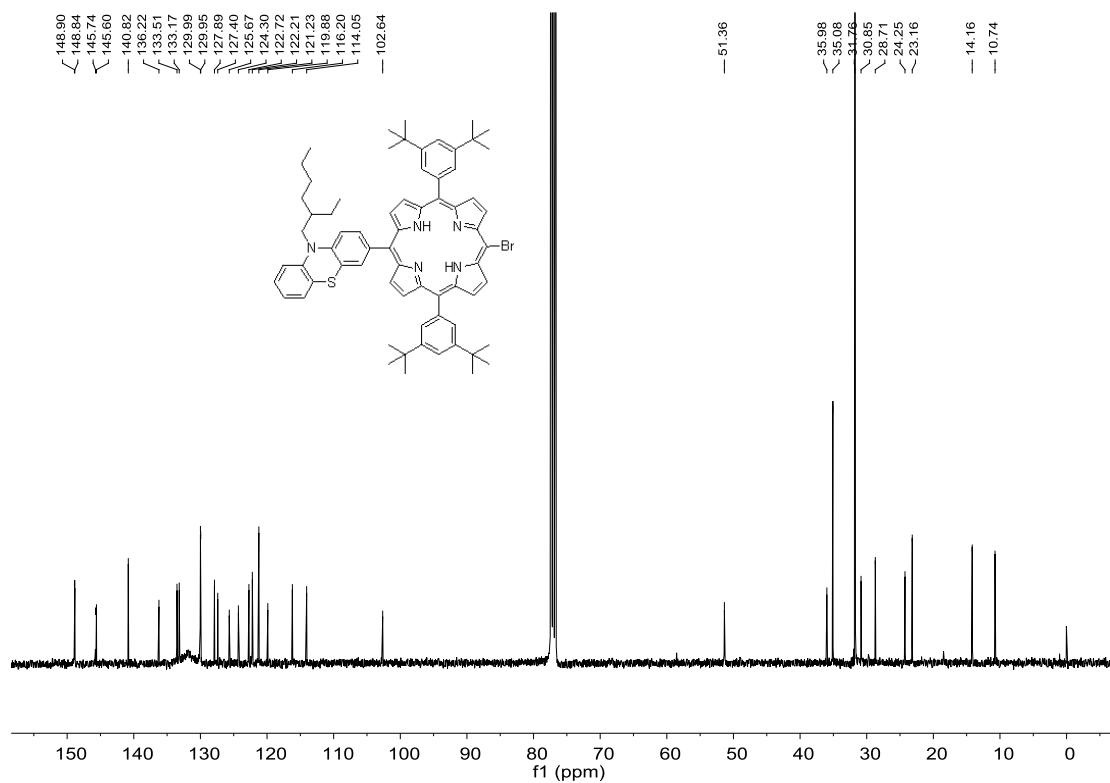

Fig. S4 <sup>13</sup>C NMR of compound **3b** in CDCl<sub>3</sub>.

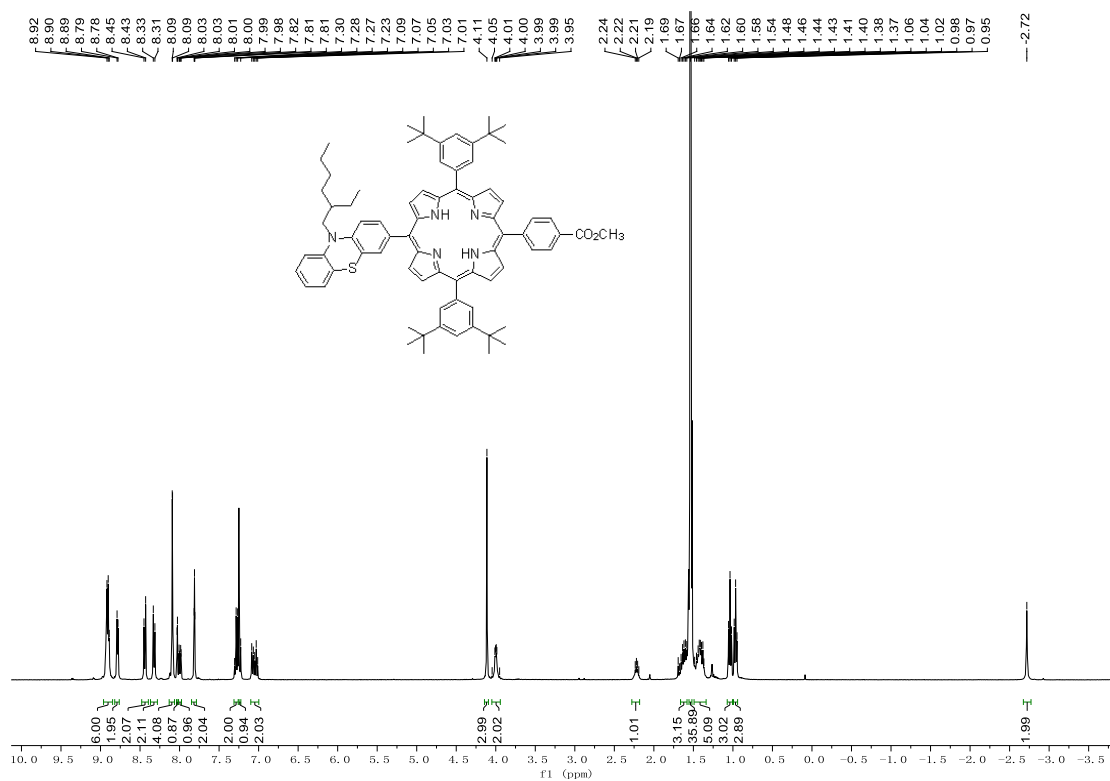

Fig. S5 <sup>1</sup>H NMR of compound 4a in CDCl<sub>3</sub>.

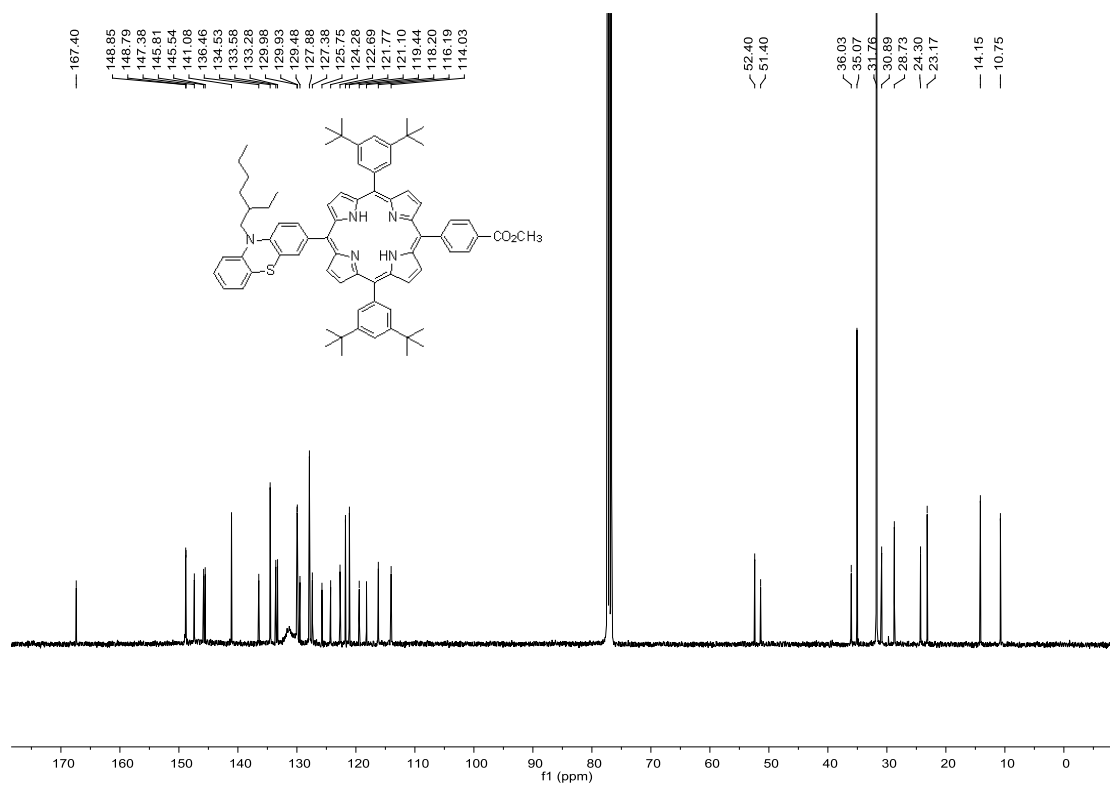

Fig. S6 <sup>13</sup>C NMR of compound 4a in CDCl<sub>3</sub>.

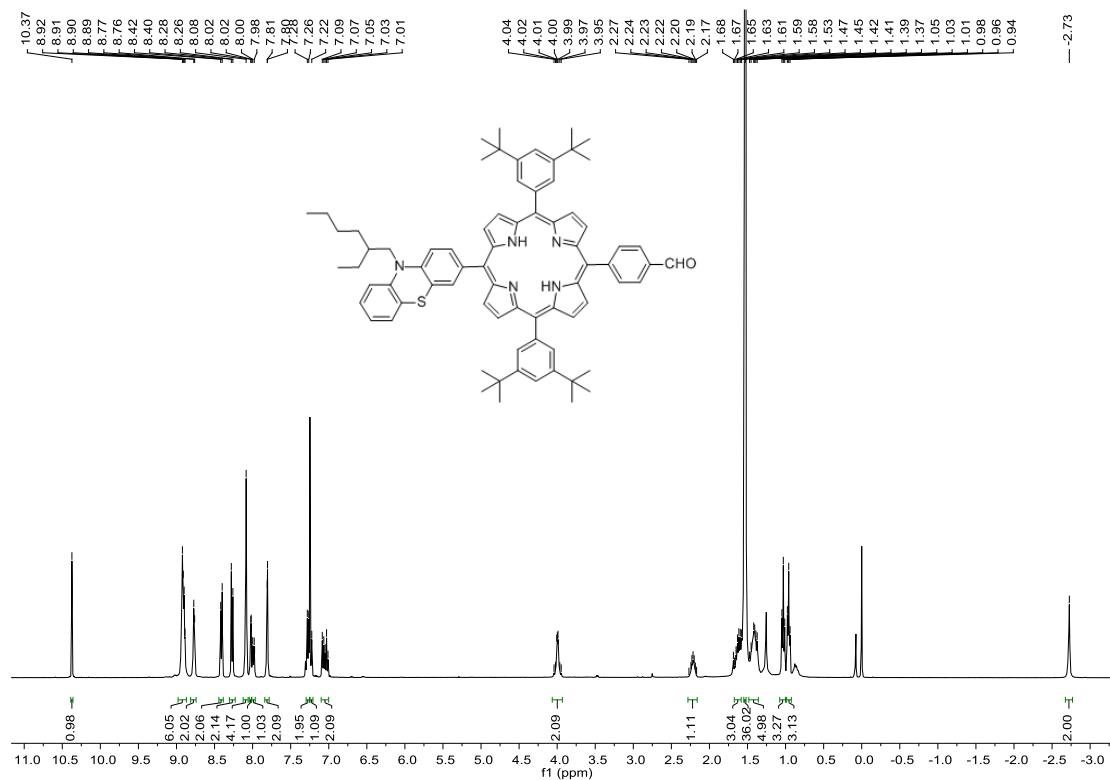

Fig. S7  $^1\text{H}$  NMR of compound **4b** in  $\text{CDCl}_3$ .

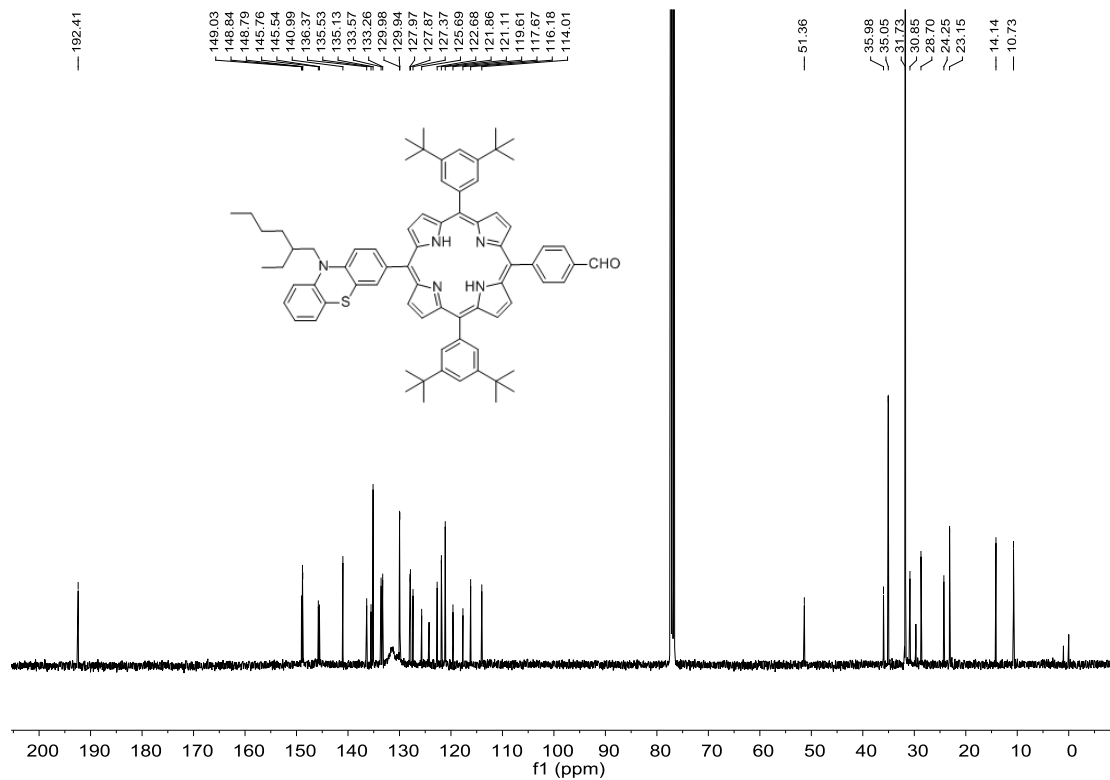

Fig. S8  $^{13}\text{C}$  NMR of compound **4b** in  $\text{CDCl}_3$ .

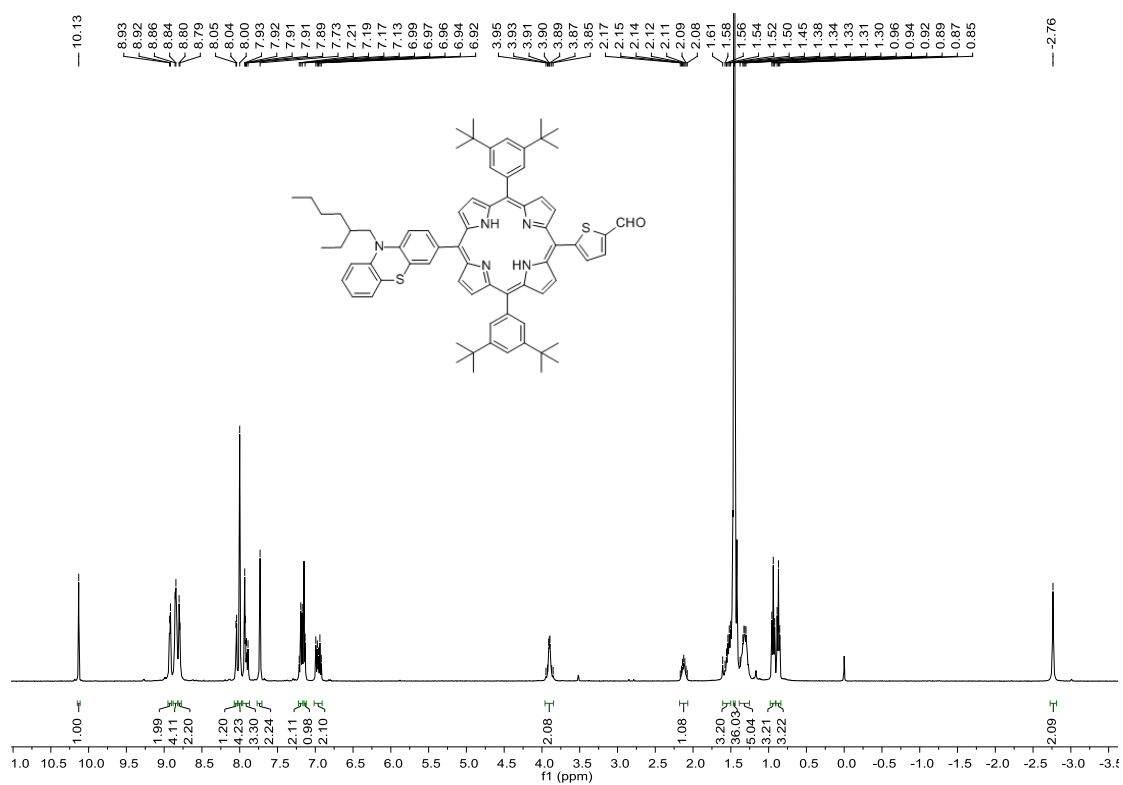

Fig. S9  $^1\text{H}$  NMR of compound **4c** in  $\text{CDCl}_3$ .

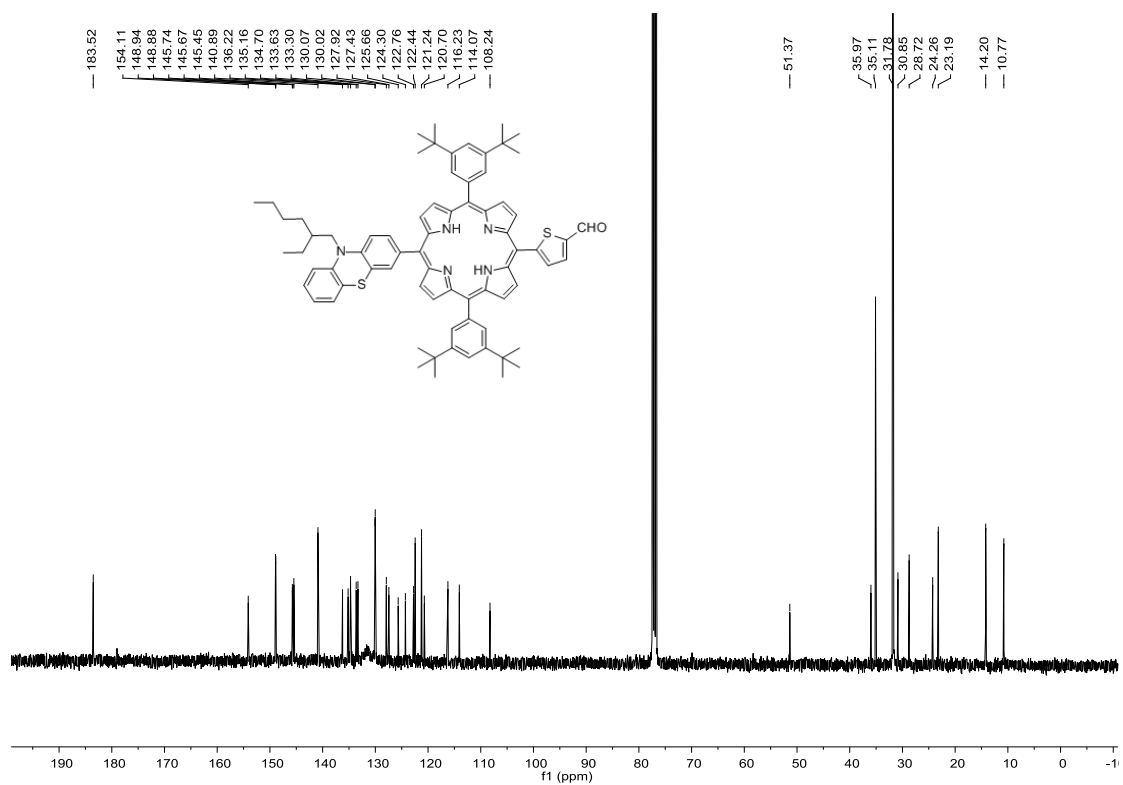

Fig. S10  $^{13}\text{C}$  NMR of compound **4c** in  $\text{CDCl}_3$ .

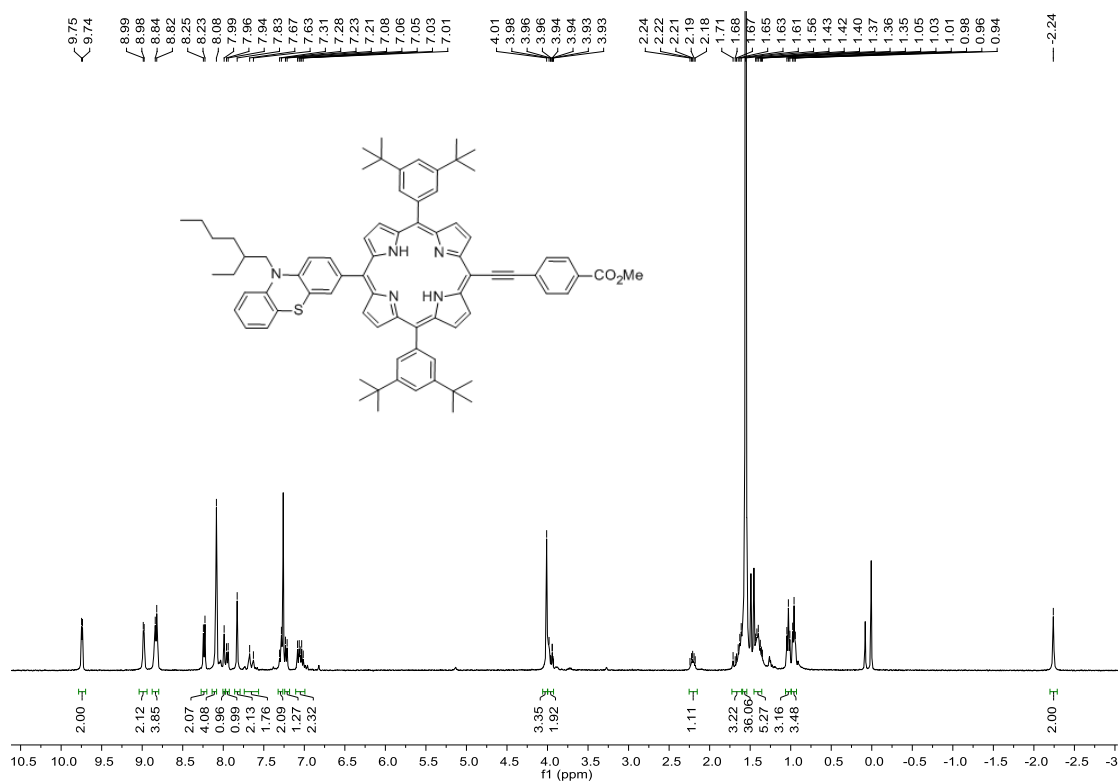

Fig. S11  $^1\text{H}$  NMR of compound **5** in  $\text{CDCl}_3$ .

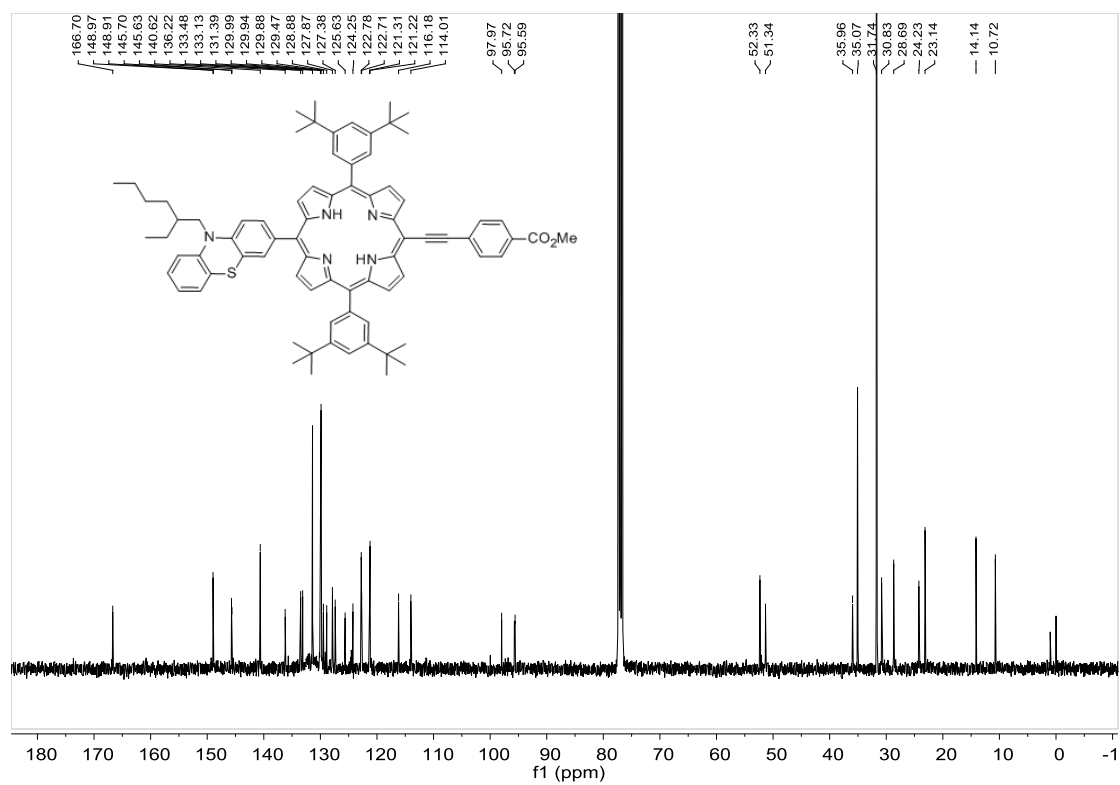

Fig. S12  $^{13}\text{C}$  NMR of compound **5** in  $\text{CDCl}_3$ .

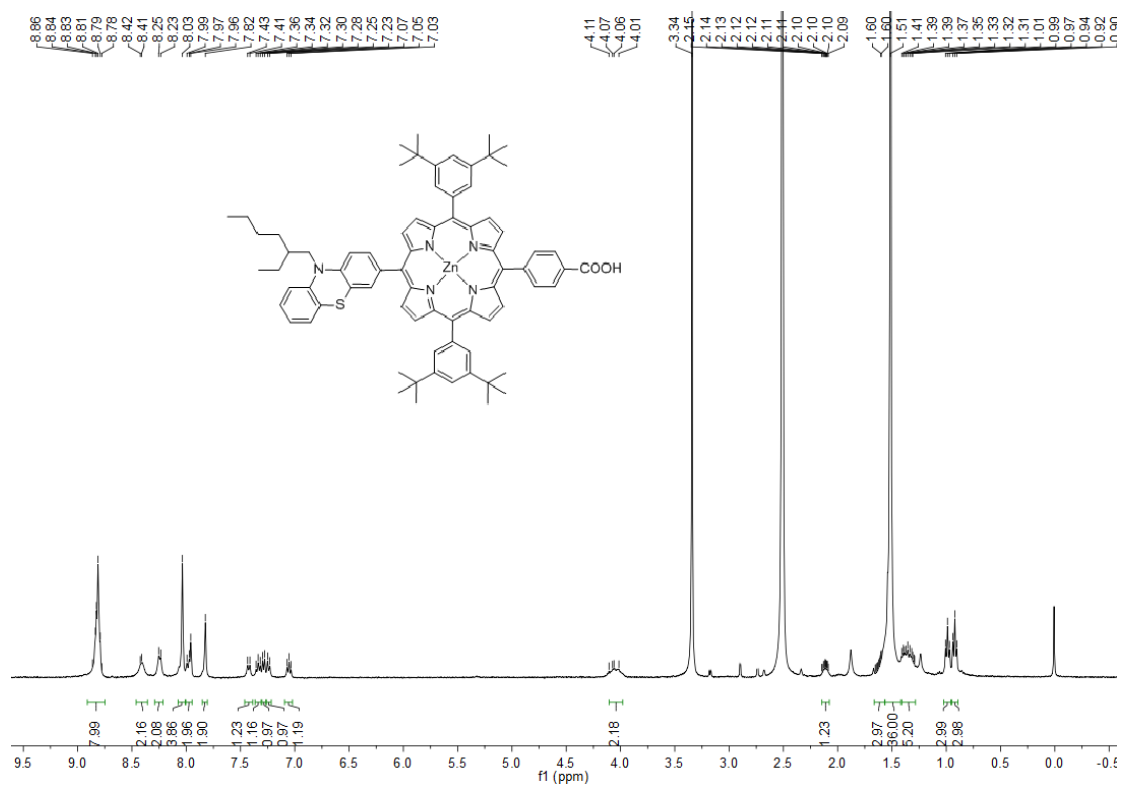

**Fig. S13** <sup>1</sup>H NMR of compound **JY24** in DMSO-*d*<sub>6</sub>.

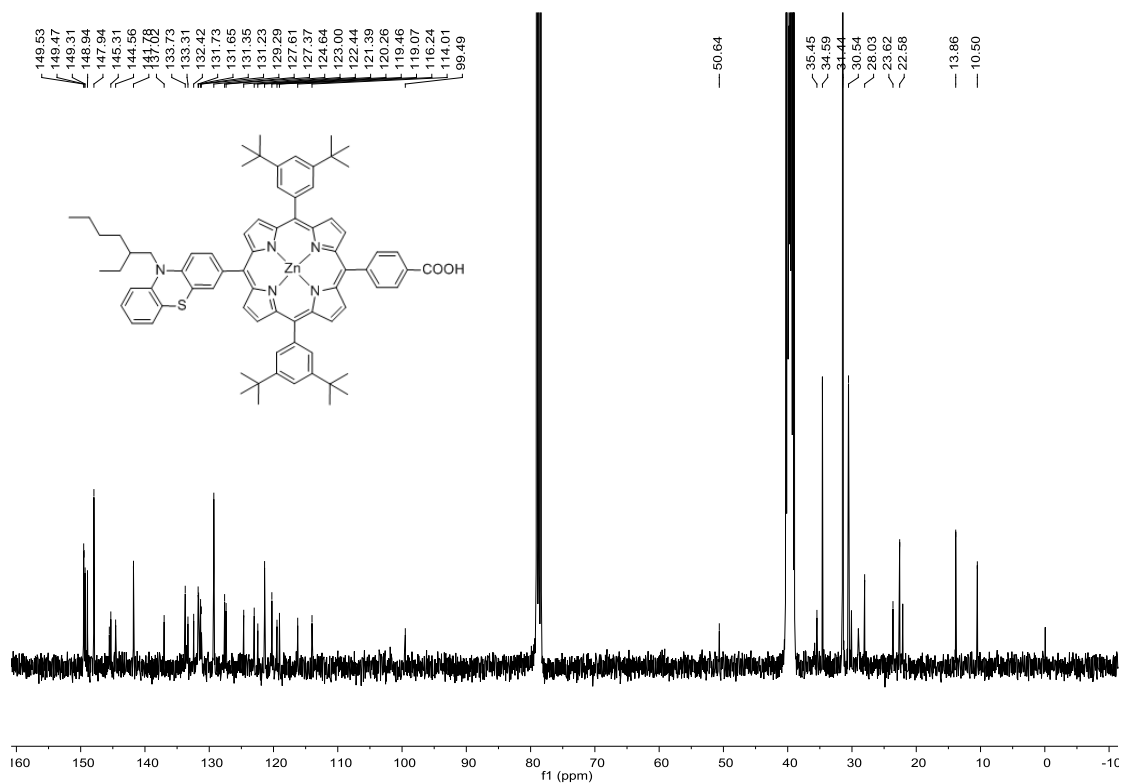

**Fig. S14** <sup>13</sup>C NMR of compound **JY24** in DMSO-*d*<sub>6</sub>.



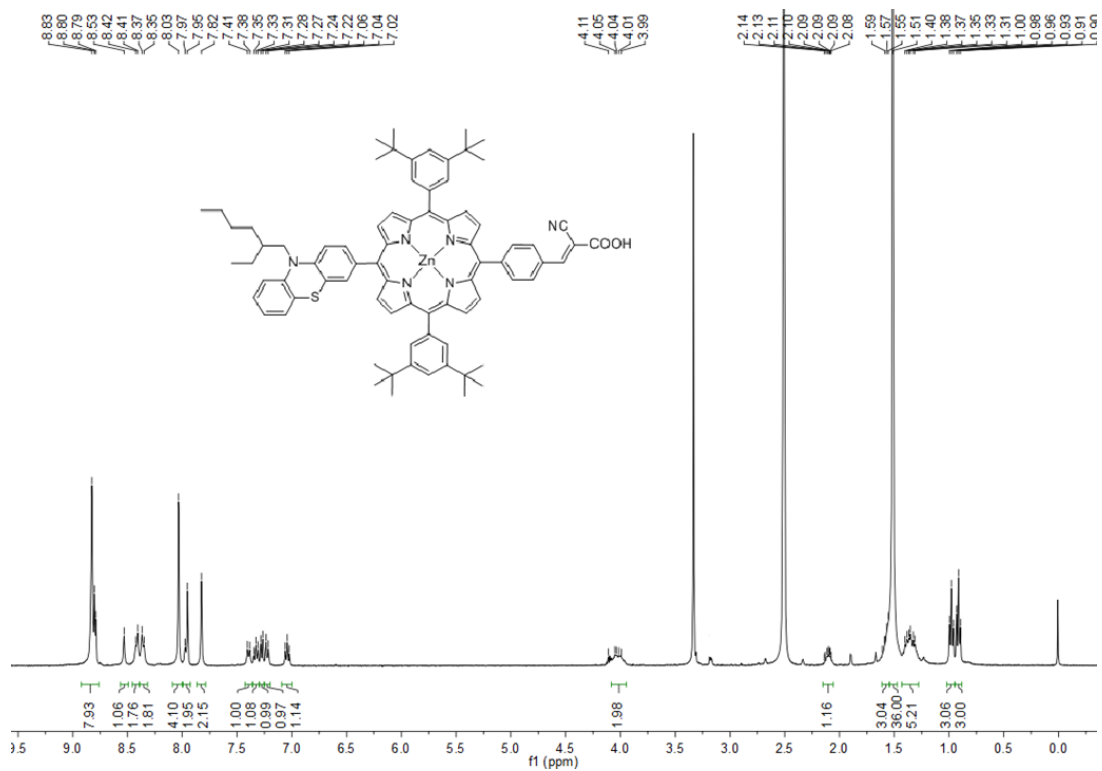

Fig. S15  $^1\text{H}$  NMR of compound JY25 in DMSO- $d_6$ .

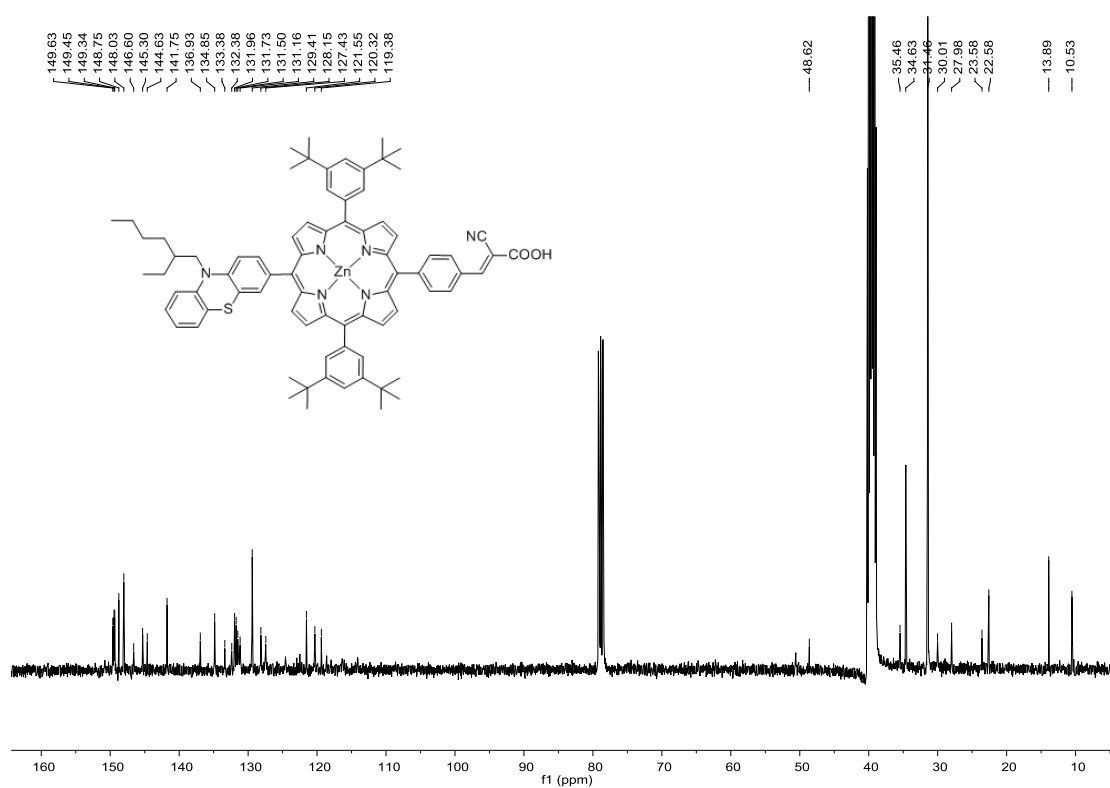

Fig. S16  $^{13}\text{C}$  NMR of compound JY25 in DMSO- $d_6$ .

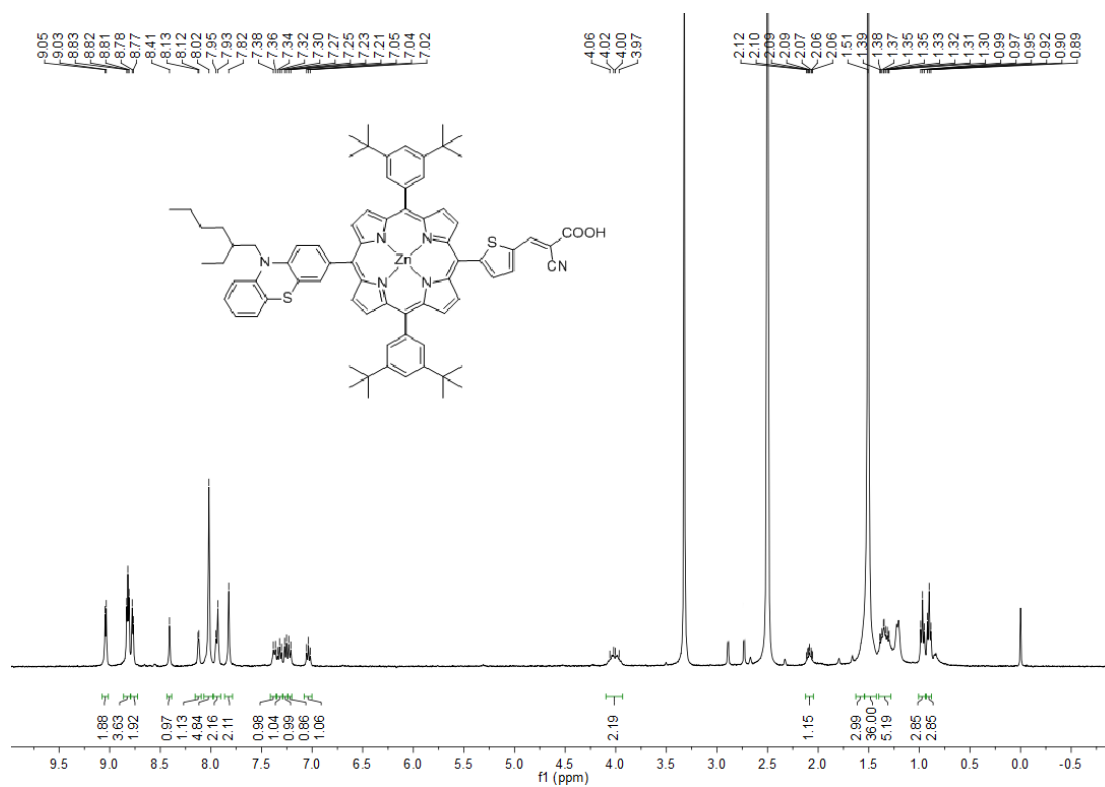

**Fig. S17** <sup>1</sup>H NMR of compound **JY26** in DMSO-*d*<sub>6</sub>.

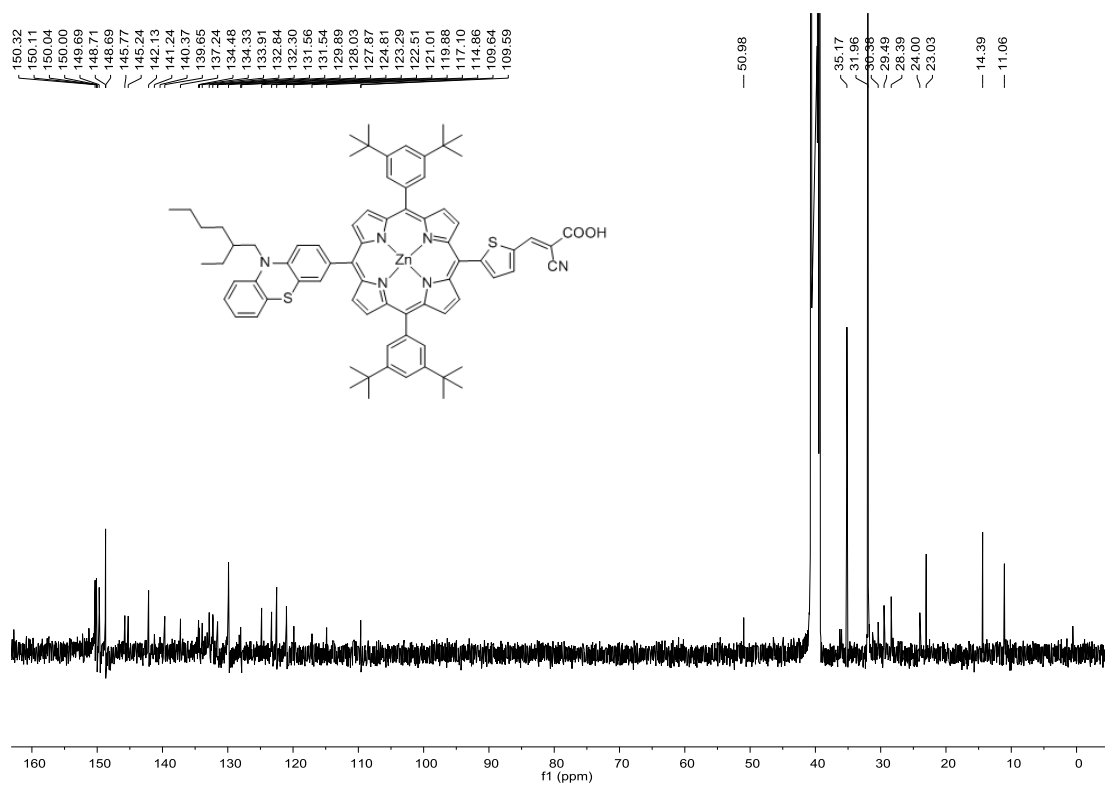

**Fig. S18** <sup>13</sup>C NMR of compound **JY26** in DMSO-*d*<sub>6</sub>.

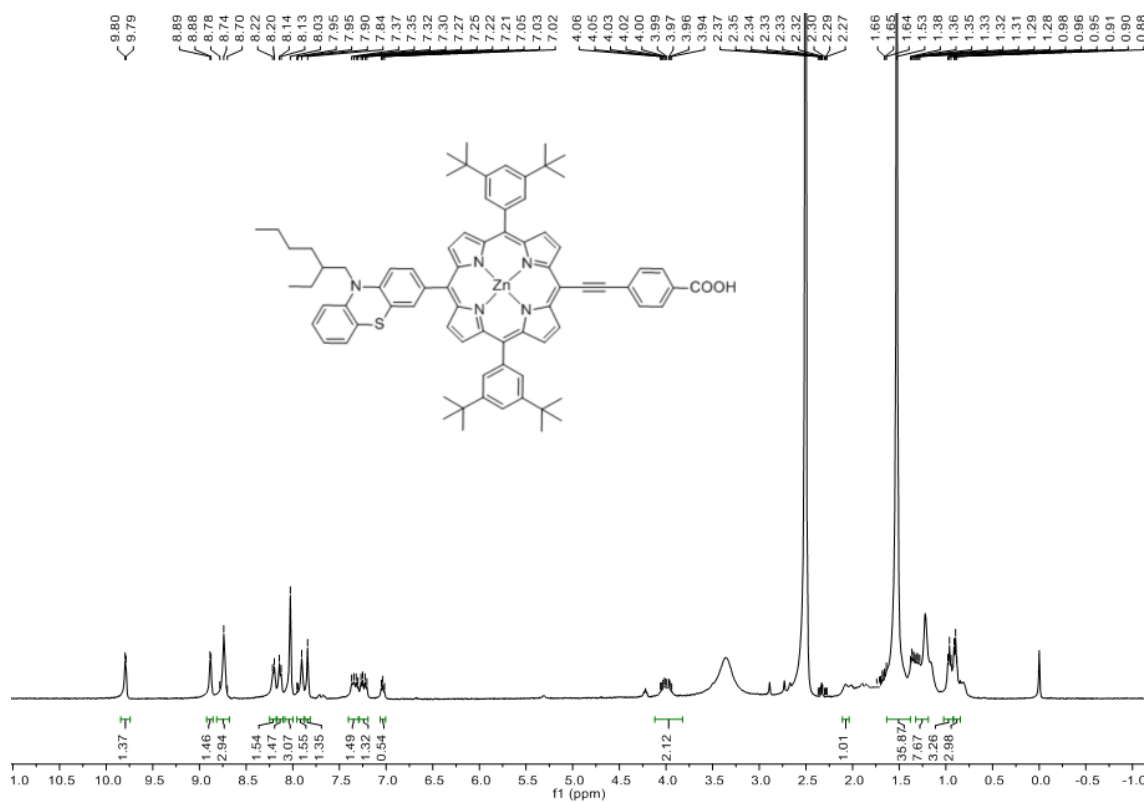

**Fig. S19** <sup>1</sup>H NMR of compound **JY27** in DMSO-*d*<sub>6</sub>.

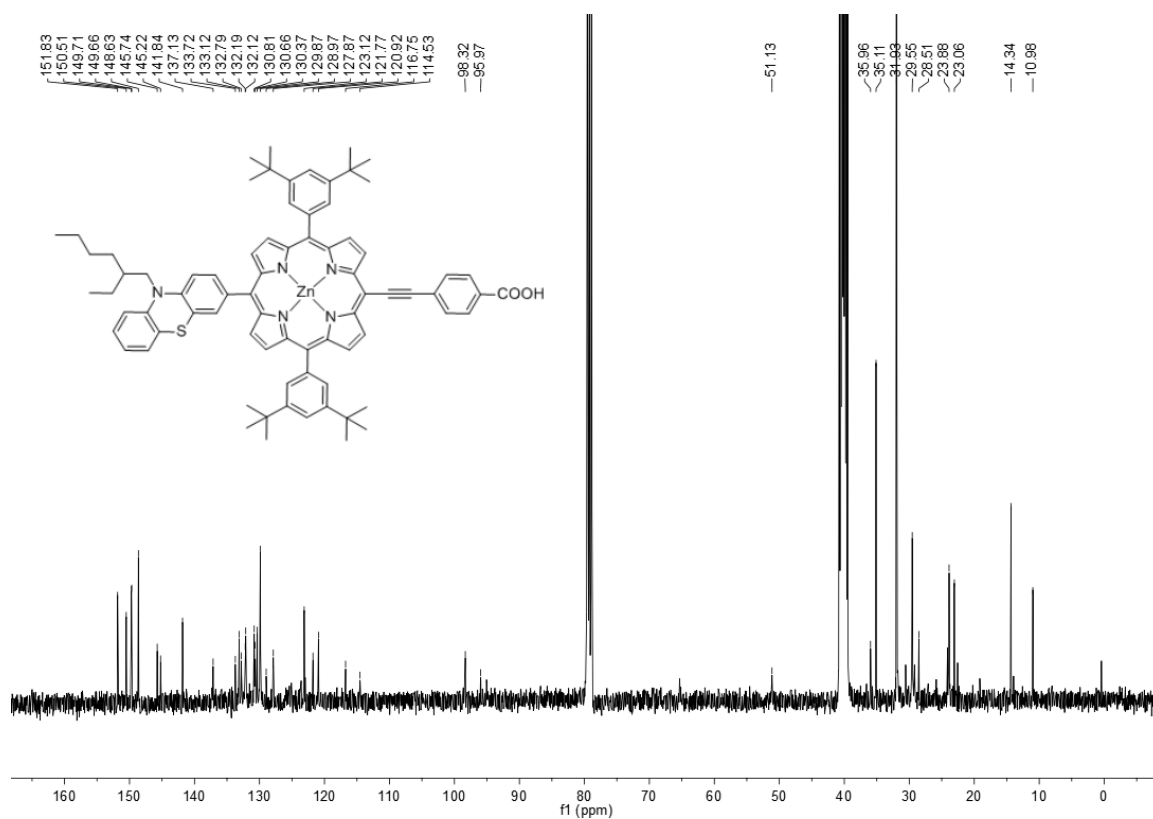

**Fig. S20** <sup>13</sup>C NMR of compound **JY27** in DMSO-*d*<sub>6</sub>.
